# Supplementary material for: Urinary Extracellular Vesicle Protein Profiles Discriminate Different Clinical Subgroups of Children with Idiopathic Nephrotic Syndrome
Source: MDPI journal article supplement (doi:10.3390/diagnostics11030456), 2021-03-06
Supplement: s1 [file s1]

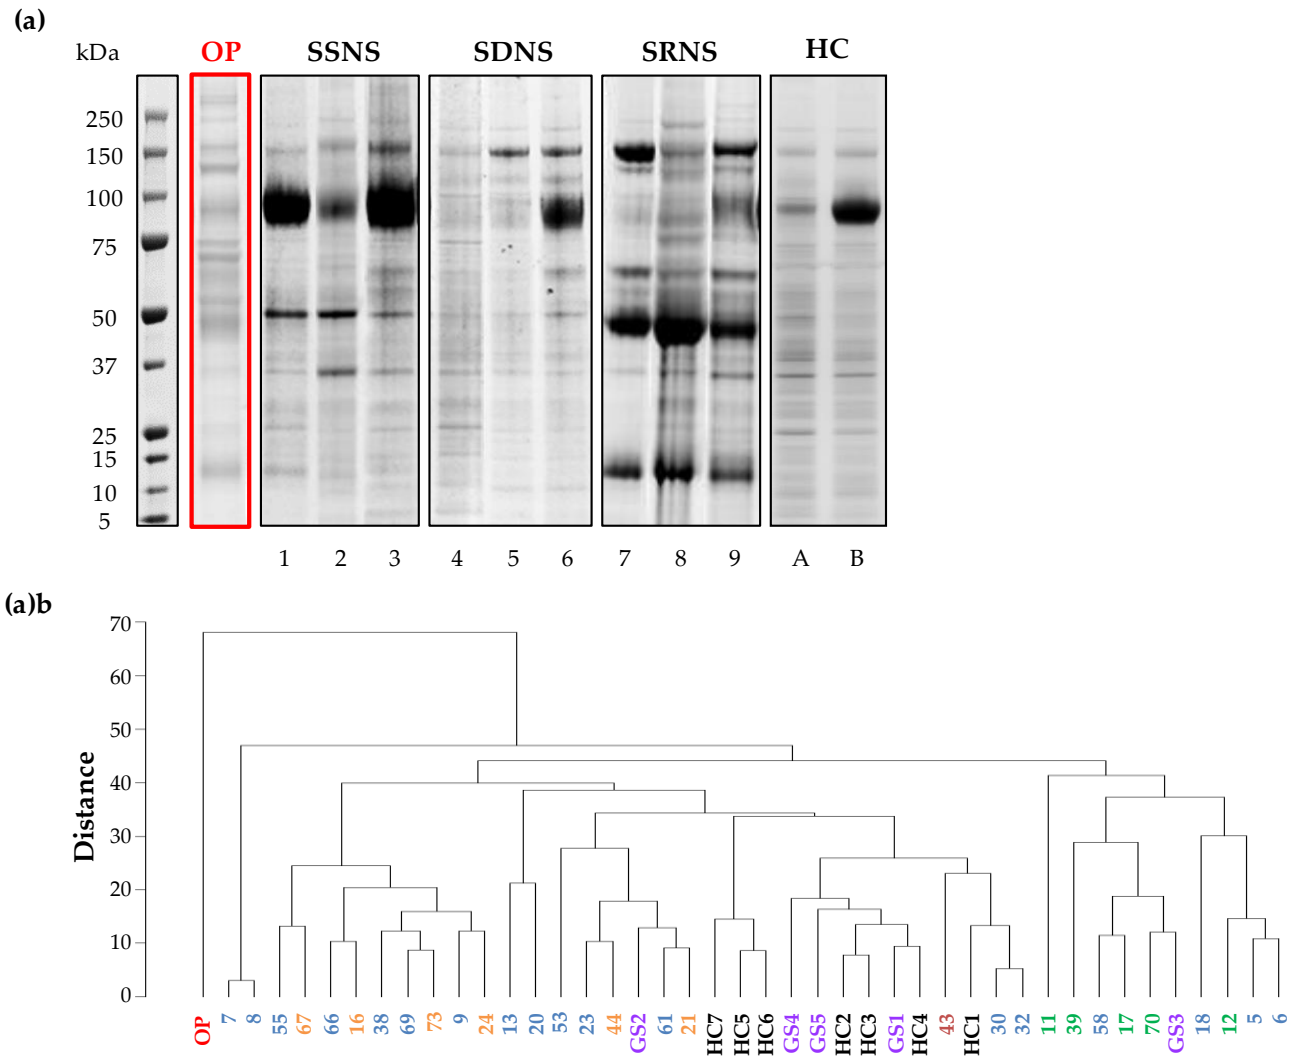

**Figure S1. UEv protein profile analysis of the patient affected by orthostatic proteinuria.** a) NuPAGE 4-12% electro-phoresis and Sypro Ruby protein gel staining. Patient affected by orthostatic proteinuria (OP); Patients affected by INS: steroid-sensitive (SSNS), steroid-dependent (SDNS), steroid-resistant (SRNS); healthy controls (HC). b) Clustering analysis of INS patients, healthy control (HC) and Gitelman syndrome patients (GS): SSNS (n=7, orange), SDNS (n=18, blue), SRNS (n=5, green), GS (n=5, purple) and HC (n=7, black) and OP (n=1, red).
