# Supplementary material for: Urinary Extracellular Vesicle Protein Profiles Discriminate Different Clinical Subgroups of Children with Idiopathic Nephrotic Syndrome
Source: MDPI journal article supplement (doi:10.3390/diagnostics11030456), 2021-03-06
Supplement: s1 [file s1]

**Table S1. Genetic data of patients affected by Gitelman Syndrome [15]**

| Patient Code | Age | Sex | Gene Affected | Mutation at DNA Level* | Changes at protein Level | Mutation Type |
|--------------|-----|-----|---------------|------------------------|--------------------------|---------------|
| 5CE94        | 17  | F   | SLC12A3       | c.[1844C>T]            | p.[Ser615Leu]            | M             |
|              |     |     |               | c.[1925G>A]            | p.[Arg642His]            | M             |
| 5ML84        | 27  | F   | SLC12A3       | c.[582G>A]             | p.[Gly186Asp]            | M             |
|              |     |     |               | c.[650C>T]             | p.[Arg209Trp]            | M             |
| 5SA05        | 6   | F   | SLC12A3       | c.[1175C>T]            | p.[Thr392Ile]            | M             |
|              |     |     |               | c.[1844C>T]            | p.[Ser615Leu]            | M             |
| 6CP95        | 16  | M   | SLC12A3       | c.[2191G>A]            | p.[Gly731Arg]            | M             |
|              |     |     |               | c.[2661-2A>G]          | p.[Ala887fs]             | F             |
| 5BL94        | 16  | M   | SLC12A3       | c.[2029G>A]            | p.[Val677Met]            | M             |
|              |     |     |               | c.[506-?_741+?del]     | p.[Val169_Gln2474del]    | LD            |

Notes: \*: genetic variants are shown for the two alleles; del: deletion; M: missense mutation; N: nonsense mutation (stop); F: frameshift mutation; LD: large deletion; c.[?]: patient analyzed previously in a different laboratory, whose cDNA data are not available.
